# Supplementary material for: Identification of Proteins Implicated in the Increased Heart Rate in ShenSongYangXin-Treated Bradycardia Rabbits by iTRAQ-Based Quantitative Proteomics
Source: Evid Based Complement Alternat Med. 2015 Dec 3;2015:385953. doi: 10.1155/2015/385953 (PMC4685072; doi:10.1155/2015/385953)
Supplement: Supplementary file 1 — Supplementary table displayed a complete list of altered proteins between model and SSYX group by iTRAQ. Supplementary figure showed altered proteins between model and SSYX group. These altered proteins were classified among three categories: molecular function (A), biological process (B), and cell component (C). [file 385953.f1.pdf]

### A GO Molecular Function

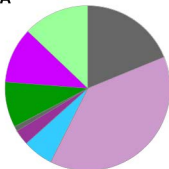

- [binding](#)
- [catalytic activity](#)
- [enzyme regulator activity](#)
- [nucleic acid binding transcription factor activity](#)
- [protein binding transcription factor activity](#)
- [receptor activity](#)
- [structural molecule activity](#)
- [transporter activity](#)

### B GO Biological Process

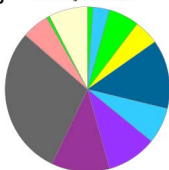

- [apoptotic process](#)
- [biological adhesion](#)
- [biological regulation](#)
- [cellular component organization or biogenesis](#)
- [cellular process](#)
- [developmental process](#)
- [immune system process](#)
- [localization](#)
- [metabolic process](#)
- [multicellular organismal process](#)
- [reproduction](#)
- [response to stimulus](#)

### C GO Cellular Component

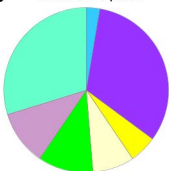

- [cell junction](#)
- [cell part](#)
- [extracellular matrix](#)
- [extracellular region](#)
- [macromolecular complex](#)
- [membrane](#)
- [organelle](#)
